# Supplementary material for: Multiple immunity-related genes control susceptibility of Arabidopsis thaliana to the parasitic weed Phelipanche aegyptiaca
Source: PeerJ. 2020 Jun 8;8:e9268. doi: 10.7717/peerj.9268 (PMC7289146; doi:10.7717/peerj.9268)
Supplement: Supplemental Information 5 [file peerj-08-9268-s005.xlsx]

## Sheet: Mock-3
Samples	ARR10 CNRQ	ARR10 SE(CNRQ)	ASC6 CNRQ	ASC6 SE(CNRQ)	BOI CNRQ	BOI SE(CNRQ)	EXPPT1 CNRQ	EXPPT1 SE(CNRQ)	IAA13 CNRQ	IAA13 SE(CNRQ)	IAA2 CNRQ	IAA2 SE(CNRQ)	MYB51 CNRQ	MYB51 SE(CNRQ)	PAD4 CNRQ	PAD4 SE(CNRQ)	PR1 CNRQ	PR1 SE(CNRQ)	SAND CNRQ	SAND SE(CNRQ)	SID2 CNRQ	SID2 SE(CNRQ)	UBQ10 CNRQ	UBQ10 SE(CNRQ)	UFP CNRQ	UFP SE(CNRQ)	VSP2 CNRQ	VSP2 SE(CNRQ)	WRKY53 CNRQ	WRKY53 SE(CNRQ)
Anonymous	NaN	NaN	NaN	NaN	NaN	NaN	NaN	NaN	NaN	NaN	NaN	NaN	NaN	NaN	NaN	NaN	NaN	NaN	NaN	NaN	NaN	NaN	NaN	NaN	NaN	NaN	NaN	NaN	NaN	NaN
M3-1	1	0.03317	1	0.02794	1	0.02937	1	0.06403	1	0.02779	1	0.06274	1	0.05366	1	0.03395	1	0.37	1	0.03015	1	0.04712	1	0.0703	1	0.05372	1	0.08585	1	0.0391
M3-2	1	0.02964	1	0.0184	1	0.1173	1	0.01915	1	0.01688	1	0.04003	1	0.03842	1	0.3432	1	0.05063	1	0.01782	1	0.02427	1	0.02313	1	0.05023	1	0.1343	1	0.03992
M3-3	1	0.03	1	0.04	1	0.03	1	0.04	1	0.14	1	0.06	1	0.04	1	0.33	1	0.4	1	0.06	1	0.03	1	0.05	1	0.06	1	0.11	1	0.03
I3-1	0.6661	0.03024	16.45	0.2456	0.3565	0.03816	1.555	0.0646	1.004	0.0511	1.401	0.1079	2.607	0.0658	1.003	0.07775	1.899	0.5515	1.007	0.0412	1.124	0.07031	0.9118	0.01398	1.09	0.02253	1.95	0.0657	4.203	0.08639
I3-2	0.9778	0.02192	5.78	0.1003	0.4649	0.01783	1.84	0.03664	0.6486	0.01298	0.5417	0.01874	1.964	0.08341	1.217	0.3318	0.5093	0.05459	1.361	0.06718	1.351	0.03062	0.9381	0.0167	0.7831	0.01974	7.759	0.4678	2.986	0.06978
I3-3	0.79	0.02	6.29	0.21	0.63	0.03	0.97	0.04	0.85	0.03	0.99	0.08	1.97	0.07	1.49	0.28	1.42	0.56	1.18	0.04	1.01	0.04	1.07	0.04	0.79	0.07	2.34	0.16	1.64	0.06
M4.1-1	0.4307	0.05856	2.291	0.2811	0.5039	0.03746	0.2275	0.08161	1.271	0.1292	4.722	0.3608	1.052	0.1203	0.1397	0.03673	30.28	3.481	1.778	0.3018	3.084	0.1944	0.552	0.03369	1.019	0.1073	108.4	8.623	0.247	0.02334
M4.1-2	0.5702	0.021	0.2341	0.02355	0.4799	0.05301	0.9737	0.02945	0.581	0.04234	1.19	0.05276	0.8747	0.09274	0.1098	0.02584	12.7	1.237	2.392	0.1403	5.222	0.3841	0.582	0.01991	0.7182	0.0573	68.11	2.393	0.2469	0.05494
M4.1-3	1.62	0.15	2.29	0.56	0.22	0.02	2.46	0.4	0.52	0.06	1.28	0.18	0.66	0.16	1.22	1.36	74.86	74.2	2.1	0.52	2.45	0.33	0.58	0.05	0.82	0.09	27.07	3.68	0.54	0.09
I4.1-1	0.5817	0.03327	4.819	0.2883	0.6438	0.07281	2.189	0.2995	1.062	0.05125	2.441	0.1649	0.4093	0.06518	0.1687	0.007949	8.46	2.595	1.042	0.1112	1.164	0.4037	1.379	0.06295	0.696	0.07201	23.17	1.099	1.426	0.1946
I4.1-2	1.117	0.3931	5.596	0.3565	0.6614	0.1824	13.13	2.622	0.6415	0.03585	0.9795	0.07687	0.8268	0.2306	0.2169	0.1007	139.2	12.61	1.442	0.01879	NaN	NaN	0.8708	0.02242	0.7964	0.02765	6.608	2.704	2.036	0.9342
I4.1-3	1.02	0.12	10.24	0.3	0.49	0.04	3.86	0.78	1.17	0.07	3.4	0.24	1.54	0.28	0.47	0.09	19.91	8.76	1.05	0.09	1.38	0.16	1.19	0.03	0.8	0.03	24.66	0.93	2.41	0.27
M4.2-1	0.4443	0.01646	4.751	0.255	0.1984	0.009185	1.135	0.04111	0.8688	0.05423	1.994	0.08889	0.7976	0.05142	2.04	0.1662	63.83	22.58	2.456	0.2506	7.803	0.3269	0.4638	0.019	0.8777	0.053	24.65	1.476	0.7087	0.1187
M4.2-2	0.9004	0.1546	1.265	0.1304	0.5214	0.05274	0.8679	0.05594	0.8244	0.04087	1.304	0.07425	1.343	0.166	0.156	0.0721	5.433	0.9459	2.691	0.1959	3.547	0.1485	0.4394	0.03898	0.8457	0.06653	137.3	9.768	0.6052	0.1274
M4.2-3	0.37	0.02	1.92	0.15	0.36	0.03	0.41	0.21	1.32	0.07	2.54	0.47	0.53	0.16	0.36	0.36	57.7	11.12	2.46	0.21	4.57	0.23	0.46	0.02	0.89	0.03	17.44	0.64	0.42	0.12
I4.2-1	0.9382	0.0996	3.786	0.3315	0.311	0.02966	0.9736	0.2589	1.152	0.05951	3.937	0.315	0.3961	0.02014	0.2683	0.03599	36.66	11.23	1.645	0.1994	1.233	0.398	0.7122	0.0363	0.8537	0.09629	8.707	0.647	0.7683	0.06957
I4.2-2	0.5081	0.04845	0.1938	0.02524	0.4967	0.03206	0.8972	0.1136	0.968	0.05391	2.653	0.3776	0.2692	0.1204	0.05269	0.03809	13.91	3.604	1.336	0.1335	1.182	0.3691	0.8504	0.03667	0.8801	0.03327	7.382	0.2974	0.4346	0.0247
I4.2-3	0.81	0.07	0.84	0.1	0.34	0.05	2	0.55	1.15	0.11	5.71	0.76	0.66	0.06	0.32	0.02	53.71	15.65	0.72	0.15	0.78	0.07	1.05	0.07	1.32	0.1	6.38	0.8	0.5	0.12

## Sheet: Mock-4.1
Samples	ARR10 CNRQ	ARR10 SE(CNRQ)	ASC6 CNRQ	ASC6 SE(CNRQ)	BOI CNRQ	BOI SE(CNRQ)	EXPPT1 CNRQ	EXPPT1 SE(CNRQ)	IAA13 CNRQ	IAA13 SE(CNRQ)	IAA2 CNRQ	IAA2 SE(CNRQ)	MYB51 CNRQ	MYB51 SE(CNRQ)	PAD4 CNRQ	PAD4 SE(CNRQ)	PR1 CNRQ	PR1 SE(CNRQ)	SAND CNRQ	SAND SE(CNRQ)	SID2 CNRQ	SID2 SE(CNRQ)	UBQ10 CNRQ	UBQ10 SE(CNRQ)	UFP CNRQ	UFP SE(CNRQ)	VSP2 CNRQ	VSP2 SE(CNRQ)	WRKY53 CNRQ	WRKY53 SE(CNRQ)
M4.1-1	1	0.135945	1	0.122696	1	0.0743369	1	0.358661	1	0.101684	1	0.076401	1	0.114305	1	0.262932	1	0.114944	1	0.169752	1	0.0630418	1	0.0610251	1	0.105341	1	0.0795428	1	0.0944755
M4.1-2	1	0.0368216	1	0.100615	1	0.110452	1	0.0302462	1	0.0728773	1	0.0443439	1	0.106022	1	0.235298	1	0.0973822	1	0.0586553	1	0.0735518	1	0.0342155	1	0.0797925	1	0.035139	1	0.222515
M4.1-3	1	0.0939942	1	0.245474	1	0.097147	1	0.161304	1	0.117936	1	0.140045	1	0.23763	1	1.11801	1	0.991172	1	0.247916	1	0.136404	1	0.0833161	1	0.115978	1	0.13589	1	0.161712
I4.1-1	1.3504	0.0772432	2.10361	0.125869	1.27759	0.144479	9.61894	1.31645	0.835526	0.0403276	0.516868	0.0349224	0.388996	0.0619445	1.20766	0.0569022	0.279377	0.0857018	0.586071	0.06251	0.377375	0.130909	2.49748	0.114043	0.6832	0.0706782	0.213748	0.0101342	5.77371	0.787886
I4.1-2	1.95861	0.689413	23.9038	1.52304	1.37824	0.380031	13.4811	2.69258	1.10407	0.061699	0.823233	0.0646102	0.94516	0.263621	1.975	0.916884	10.9574	0.993134	0.602758	0.00785593	NaN	NaN	1.49611	0.0385226	1.1089	0.0385024	0.0970233	0.0396996	8.244	3.78336
I4.1-3	0.626144	0.0733359	4.47079	0.130394	2.30198	0.197341	1.57175	0.317095	2.26285	0.132976	2.64676	0.183774	2.3378	0.426401	0.383924	0.0742644	0.265985	0.116961	0.500234	0.0408713	0.565566	0.0639759	2.02897	0.0551864	0.985259	0.0337708	0.911181	0.0344496	4.45557	0.492414

## Sheet: Mock-4.2
Samples	ARR10 CNRQ	ARR10 SE(CNRQ)	ASC6 CNRQ	ASC6 SE(CNRQ)	BOI CNRQ	BOI SE(CNRQ)	EXPPT1 CNRQ	EXPPT1 SE(CNRQ)	IAA13 CNRQ	IAA13 SE(CNRQ)	IAA2 CNRQ	IAA2 SE(CNRQ)	MYB51 CNRQ	MYB51 SE(CNRQ)	PAD4 CNRQ	PAD4 SE(CNRQ)	PR1 CNRQ	PR1 SE(CNRQ)	SAND CNRQ	SAND SE(CNRQ)	SID2 CNRQ	SID2 SE(CNRQ)	UBQ10 CNRQ	UBQ10 SE(CNRQ)	UFP CNRQ	UFP SE(CNRQ)	VSP2 CNRQ	VSP2 SE(CNRQ)	WRKY53 CNRQ	WRKY53 SE(CNRQ)
M4.2-1	1	0.0370511	1	0.0536662	1	0.0462909	1	0.0362073	1	0.0624282	1	0.0445761	1	0.0644681	1	0.0814565	1	0.35377	1	0.102015	1	0.041898	1	0.0409661	1	0.060385	1	0.0598651	1	0.167423
M4.2-2	1	0.171739	1	0.10306	1	0.101147	1	0.0644535	1	0.0495773	1	0.0569539	1	0.123575	1	0.462099	1	0.174107	1	0.0728087	1	0.0418703	1	0.0887213	1	0.0786669	1	0.071129	1	0.210482
M4.2-3	1	0.0672137	1	0.0766416	1	0.0732741	1	0.495836	1	0.0534554	1	0.183502	1	0.30834	1	1.00433	1	0.192683	1	0.086142	1	0.0511407	1	0.0392469	1	0.033207	1	0.0364734	1	0.284516
I4.2-1	2.11136	0.224161	0.796849	0.069771	1.56717	0.149487	0.857512	0.227992	1.32587	0.068504	1.97412	0.157973	0.496601	0.0252552	0.131481	0.0176369	0.574361	0.175856	0.669534	0.0811915	0.15803	0.0509988	1.53554	0.0782637	0.97267	0.109709	0.353186	0.026243	1.08419	0.0981654
I4.2-2	0.564311	0.0538167	0.15319	0.0199572	0.952755	0.0614894	1.03383	0.130941	1.17413	0.0653894	2.03536	0.28968	0.200443	0.089634	0.337726	0.244156	2.55988	0.663376	0.496527	0.0496079	0.333338	0.10406	1.93547	0.0834571	1.04057	0.0393406	0.0537556	0.00216531	0.718144	0.0408127
I4.2-3	2.18044	0.189814	0.434838	0.0531874	0.945033	0.143732	4.82438	1.32959	0.875277	0.0855467	2.25126	0.299263	1.23124	0.110013	0.868824	0.0579567	0.930789	0.271256	0.294368	0.061246	0.170976	0.0153112	2.28812	0.155596	1.48467	0.109681	0.366162	0.0457815	1.18023	0.276097
